# Supplementary material for: Three-Dimensional Printed Carbon Black/PDMS Composite Flexible Strain Sensor for Human Motion Monitoring
Source: MDPI journal article supplement (doi:10.3390/mi13081247), 2022-08-02
Supplement: s1 [file s1]

## Support material

### 3D printed carbon black/PDMS composite flexible strain sensor for human motion monitoring

Haishan Lian <sup>1</sup>, Ming Xue <sup>2</sup>, Kanglin Ma <sup>1</sup>, Deyun Mo <sup>1</sup>, Zaifu Cui <sup>1</sup>, Lei Wang <sup>1,\*</sup> and Xiaojun Chen <sup>1,\*</sup>

<sup>1</sup> School of Mechanical and Electronic Engineering, Lingnan normal university, Zhanjiang, China

<sup>2</sup> Dongguan Technician College, Dongguan, China

\* Correspondence: wanglei1999-1999@163.com (L.W); chxj@lingnan.edu.cn (XJ.C)

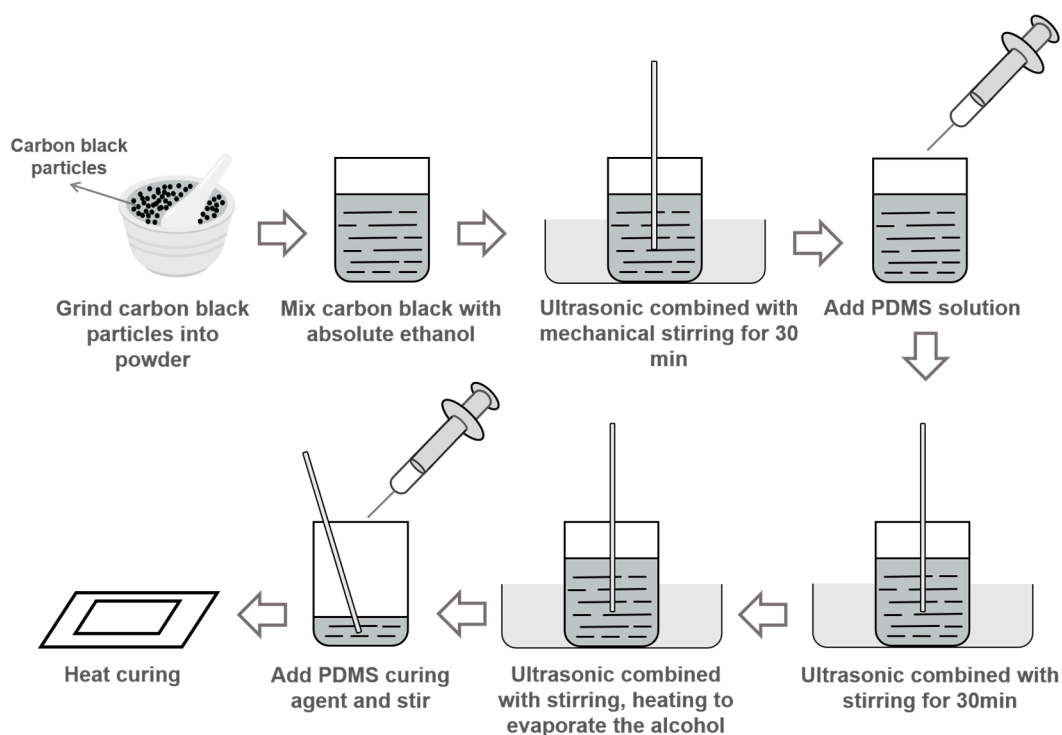

Figure S1: Preparation process of carbon black/PDMS composites
